# Supplementary material for: Therapeutic lumbar puncture for headache in idiopathic intracranial hypertension: Minimal gain, is it worth the pain?
Source: PubMed Central journal article supplement (PMC6376596; doi:10.1177/0333102418782192), 2018-06-17
Supplement: Supplementary_table.pdf [file Supplementary_table.pdf]

**Supplementary Table 1:** Headache scoring responses at each time interval from total of 66 paper diaries.

| Time Point | Hours |    |    |    | Days |    |    |    |    |    |    |
|------------|-------|----|----|----|------|----|----|----|----|----|----|
|            | 0     | 1  | 4  | 6  | 1    | 2  | 3  | 4  | 5  | 6  | 7  |
| Responses  | 66    | 66 | 63 | 63 | 63   | 63 | 64 | 64 | 65 | 65 | 66 |
